# Supplementary material for: Salmonella Typhimurium with Eight Tandem Copies of blaNDM-1 on a HI2 Plasmid
Source: MDPI journal article supplement (doi:10.3390/microorganisms12010020), 2023-12-22
Supplement: s1 [file s1]

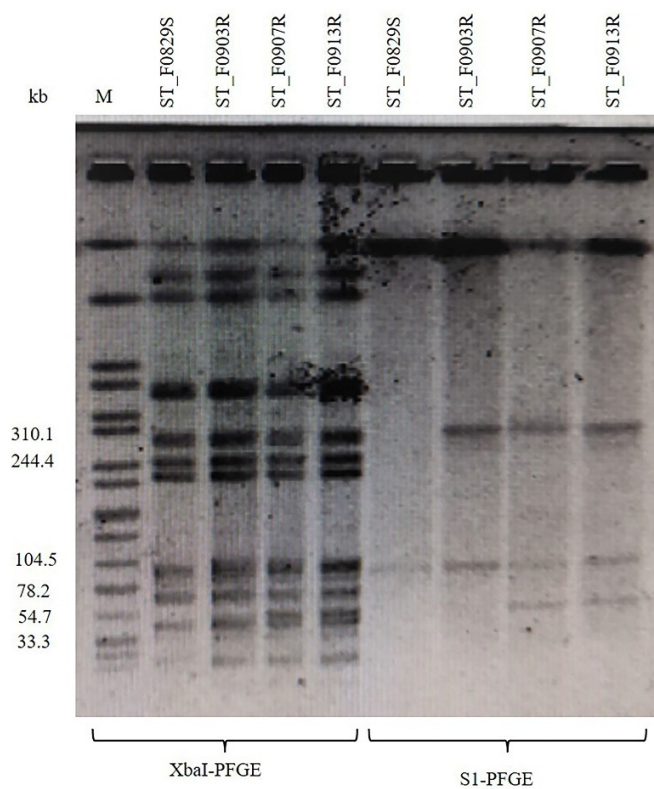

**Supplementary Figure S1.** The band profiles of XbaI-PFGE and S1-PFGE. Lane M, *Salmonella* serotype Braenderup strain H9812 as a molecular marker.

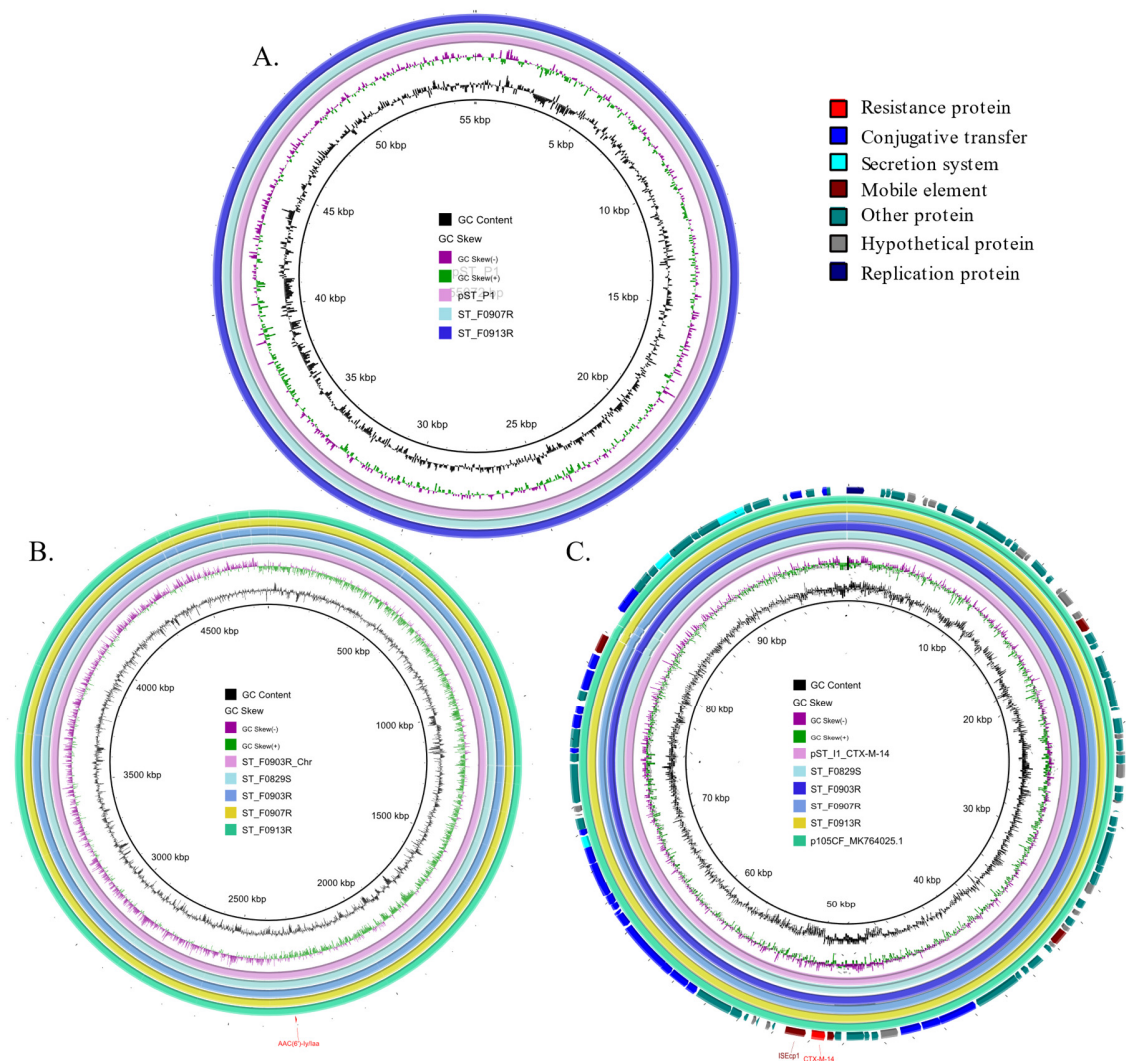

**Supplementary Figure S2.** Circular maps of chromosome and plasmids in the *Salmonella* Typhimurium isolates. A. The circle genome alignment map of pST\_P1. The inner scale is marked in kbp. Circles range from 1 (the inner circle) to 5 (the outer circle). Circle 1, GC content, inward indicates lower than the average GC content, and outward indicates higher than the average GC content; circle 2, GC skew ( $G-C/G+C$ ), values  $> 0$  are in green, and values  $< 0$  are in purple; circle 3, the complete sequence of pST\_P1; circle 4–5, the draft genomes of *Salmonella* Typhimurium isolates. B. Comparative genome

analysis with the ST\_F0903R chromosome as the reference sequence. Circles range from 1 (the inner circle) to 7 (the outer circle). Circle 3, the ST\_F0903R strain chromosome sequence; circle 4-7, the draft genomes of *Salmonella* Typhimurium isolates. C. The circle genome alignment map of pST\_I1\_CTX-M-14. Circles range from 1 (the inner circle) to 9 (the outer circle). Circle 4-7, the draft genomes of *Salmonella* Typhimurium isolates. The outermost ring is the CDSs (encoding sequences), represented by the corresponding colored arrows.

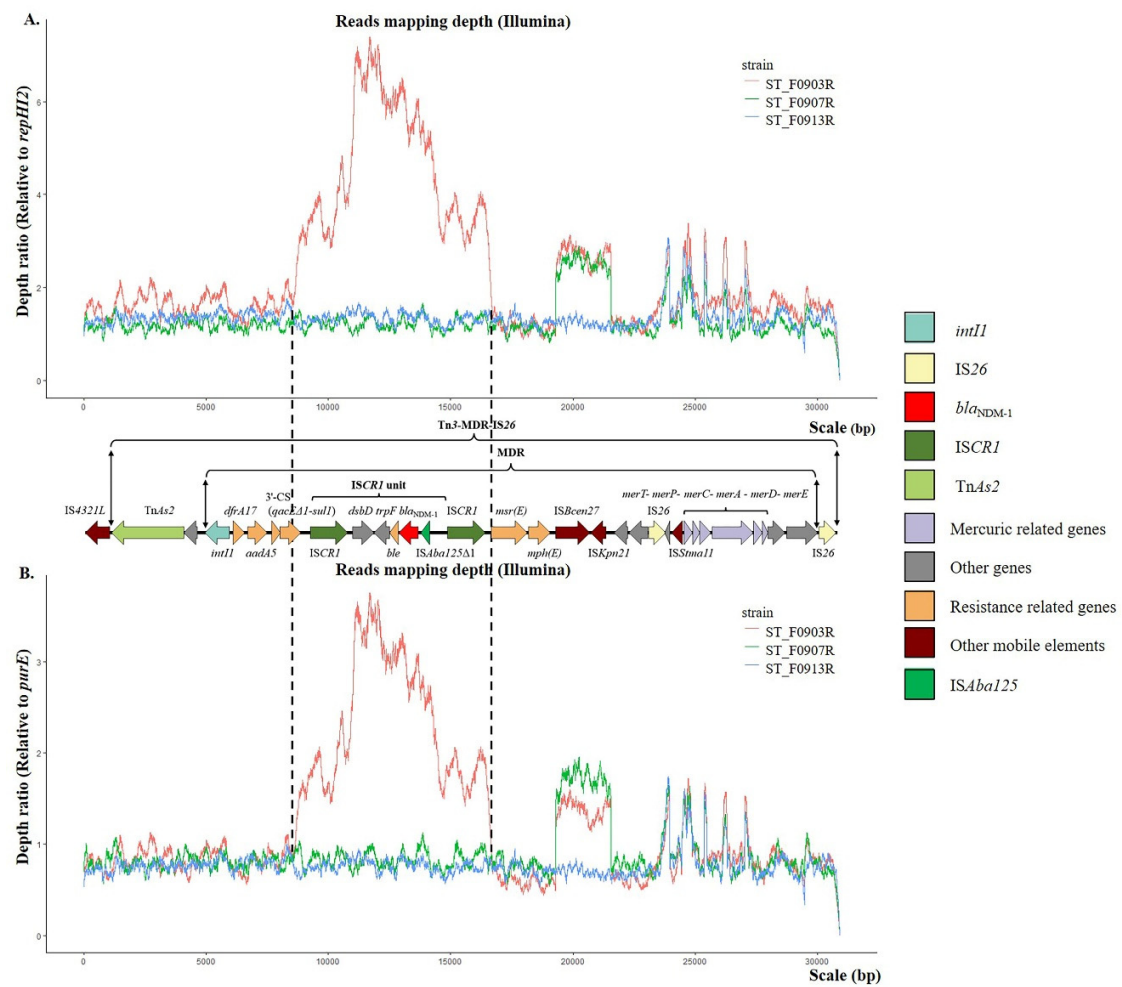

**Supplementary Figure S3.** Illumina sequencing reads mapping depth ratio of the *TnAs2*-MDR-IS26 region relative to the *repH2* and *purE* genes.
